# Supplementary figures and images for: Does Heavy-Resistance Training Improve Mobility and Perception of Quality of Life in Older Women?
Source: MDPI journal article supplement (doi:10.3390/biology11050626), 2022-04-20

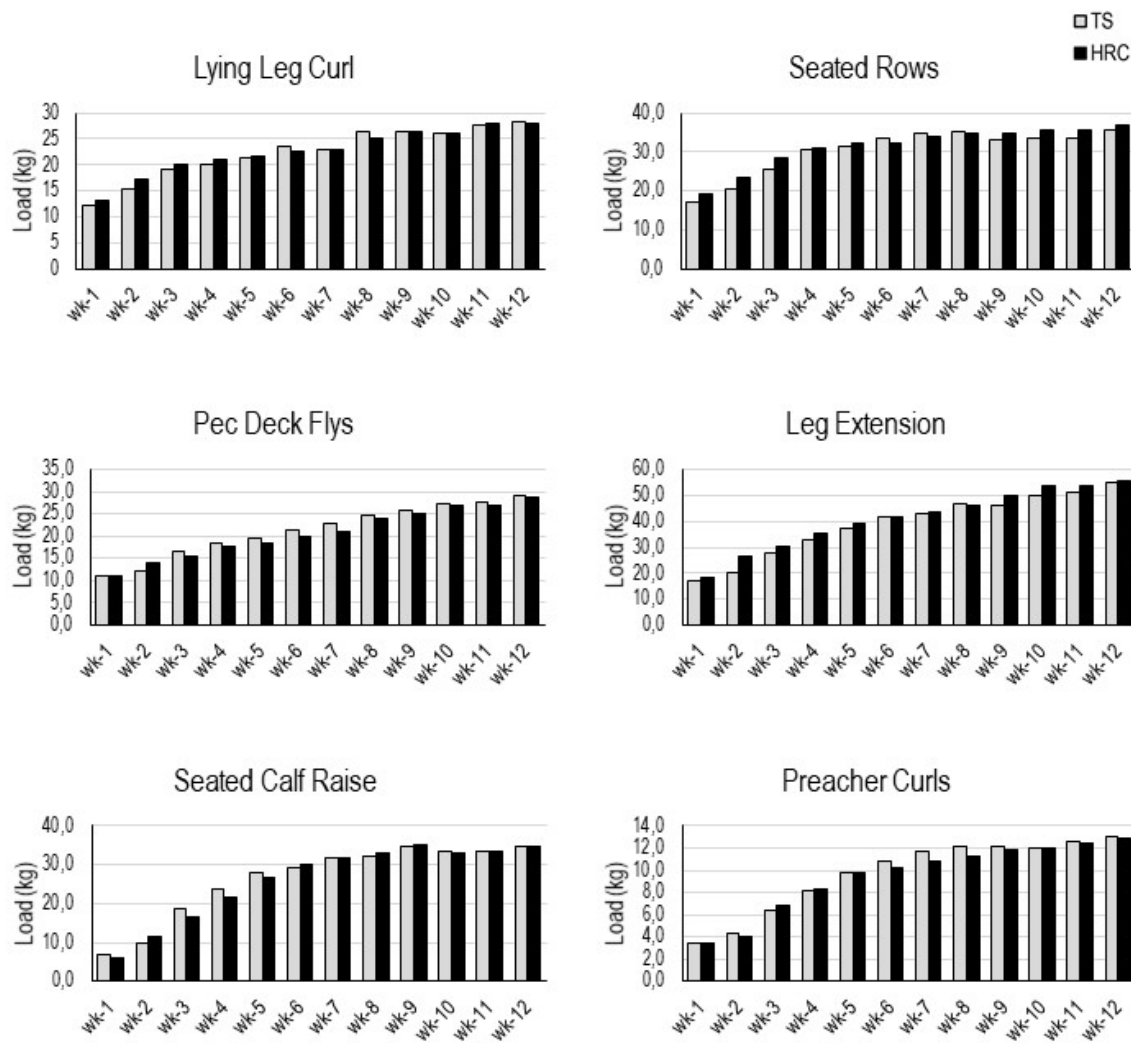

Figure S1. Evolution of the loads for each exercise over the period of training.

Supplement: s1 [file s1]
